# Supplementary material for: 2-Line ferrihydrite: synthesis, characterization and its adsorption behaviour for removal of Pb(ii), Cd(ii), Cu(ii) and Zn(ii) from aqueous solutions
Source: Royal Society of Chemistry journal article supplement (doi:10.1039/c2dt11651k), 2012-01-01
Supplement: c2dt11651k.pdf [file c2dt11651k.pdf]

Supplementary Data of paper entitled “2-line ferrihydrite: Synthesis, characterization and its adsorption behaviour for removal of Pb(II), Cd(II), Cu(II) and Zn(II) from aqueous solutions”, by K.Rout, M. Mohapatra and S. Anand

**Table S1**

Comparison of synthesis procedure of 2-line ferrihydrite by precipitation

| Material and condition                                                                                                             | Characterisation                 | Property studied                                             | Ref. |
|------------------------------------------------------------------------------------------------------------------------------------|----------------------------------|--------------------------------------------------------------|------|
| 0.05M Fe(NO <sub>3</sub> ) <sub>3</sub> neutralised with 1M NaOH till pH 7                                                         | XRD and pore size distribution   | Pore size distribution                                       | [12] |
| 0.2M Fe(NO <sub>3</sub> ) <sub>3</sub> neutralised with 1M NaOH till pH 7.5                                                        | XRD, Raman, TEM, SEM             | Arsenic adsorption                                           | [13] |
| Fe(NO <sub>3</sub> ) <sub>3</sub> .9H <sub>2</sub> O soln. neutralised with NH <sub>4</sub> OH soln. till pH 10                    | Mossbauer spectroscopy, and XAFS | surface structure and its effect on phase transformation     | [14] |
| Cornell and Schwertmann method                                                                                                     | -                                | Adsorption studies of Mo and V onto ferrihydrite             | [15] |
| Fe(NO <sub>3</sub> ) <sub>3</sub> .9H <sub>2</sub> O soln. neutralised with KOH soln till pH 7.5.                                  | FT-IR, Raman                     | Thermal transformations of ferrihydrite                      | [16] |
| 1.48 M FeCl <sub>3</sub> soln. + 1.48 M H <sub>3</sub> BO <sub>3</sub> soln neutralised with 1.1 M Na <sub>2</sub> CO <sub>3</sub> | XRD, Mossbauer spectroscopy      | Ferrihydrite modification by boron doping                    | [17] |
| Schwertmann and Cornell method                                                                                                     | -                                | Arsenite and Arsenate Adsorption:                            | [18] |
| 36 mM Fe(NO <sub>3</sub> ) <sub>3</sub> soln. + 12 mM NaNO <sub>3</sub> soln neutralised with 4 M NaOH till pH 8.0                 | -                                | Modelling molybdate and tungstate adsorption to ferrihydrite | [19] |

Ref. 12-19 of main manuscript

[12] Peter G. Weidler, *J. Porous Mater.* 1997, 4, 165.

[13] Z. Li, T. Zhang, K. Li, *Dalton Trans.*, 2011, 40, 2062.

- [14] J. Zhao, E. Huggins, Z. Feng, G. P. Huffman, *Clays and Clay Minerals*, 1994, 42, 737.
- [15] L. Brinza, L.G. Benning, P.J. Statham, *Mineralogical Magazine*, 2008, 72, 385.
- [16] L. Mazzetti, P.J. Thistlethwaite, *J. Raman Spectrosc.* 2002, 33, 104.
- [17] J.G. Stevens, A.M. Khasanov, M.S. Grasettewhite, *Hyperfine Interactions*, 2003, 151/152, 2830.
- [18] K.P. Raven, A. Jain, R. Loeppert, *Environ. Sci. Technol.* 1998, 32, 344.
- [19] J.P. Gustafsson, *Chemical Geology* 2003, 200, 105.

**Fig. S1**

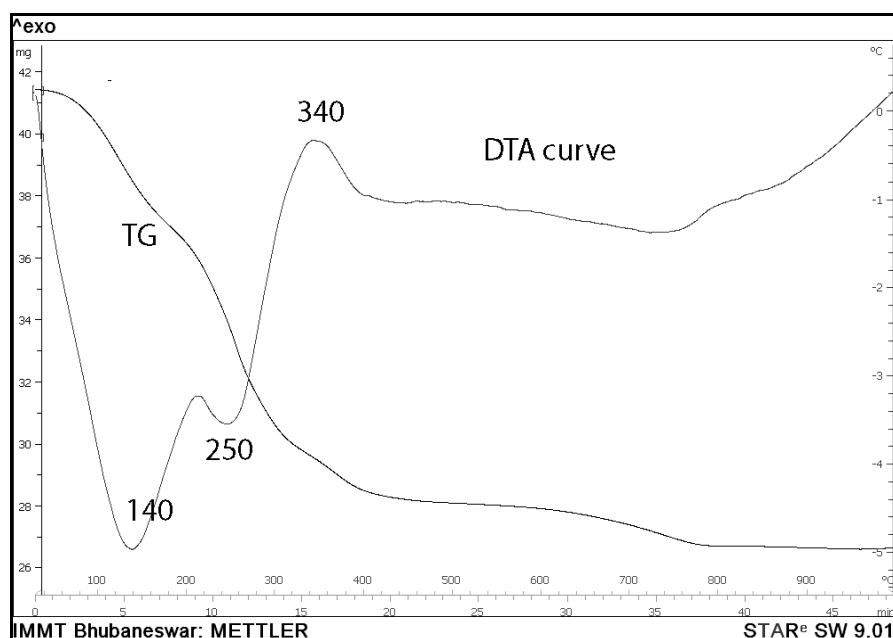

**Fig. S1** TG-DTA traces of 2-line ferrihydrite sample

Fig. S1 gives TG-DTA traces of 2-line ferrihydrite. From the mass loss could be divided in three steps in the temperature range of 30–400°C considering the peaks observed in DTA trace. The first mass loss step with a weight loss 7.2% in the temperature range of 30–140°C accompanied with an endo peak at 140°C was mainly assigned to the removal of free water or physisorbed water.<sup>24</sup> The second weight loss of 16.5% in the range of 140–270°C

accompanied with an endo-peak at 250°C was associated with partial decomposition of ferrihydrite.<sup>25</sup> Synthetic ferrihydrite generally gives a single sharp exothermic DTA peak between 300 to 350°C.<sup>26</sup> Weight loss of 8.9% corresponding to an exo- peak at 340°C could be due to final formation of hematite which results from energy released on the re-crystallization of hematite.<sup>27</sup>

Ref. 24-27 of main manuscript

[24] M.A. Strongin, D.R. Parise, *Chem. Mater.* 2007, 19, 1489.

[25] H. Liu , Y.Wang, Y. Ma, Y. Wei, G. Pan, *Chemosphere*, 2010,79 , 802.

[26] L. Carlson, U. Schwertmann, *Geochim. Cosmochim. Acta*, 1981, 45, 421.

[27] J.Yu, M. Park, J. Kim, *Geochem. J.* 2002, 36, 119.

Fig. S2 shows the SAED pattern with diffused rings confirming the powder to be weakly crystalline.

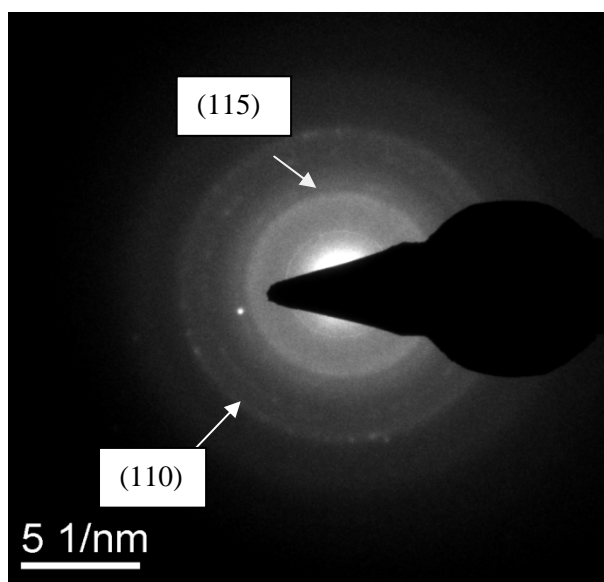

Fig. S2 SAED pattern of 2-line ferrihydrite
